# Supplementary material for: Association between 4-dimension lifestyle pattern and 10-year mortality risk in Chinese individuals older than 65: a population-based cohort study
Source: publisher site journal article supplement (doi:10.18632/aging.202695), 2021-03-19
Supplement: Supplementary file [file aging-v13i6-202695-supplementary-material-SD1.pdf]

## SUPPLEMENTARY FIGURE

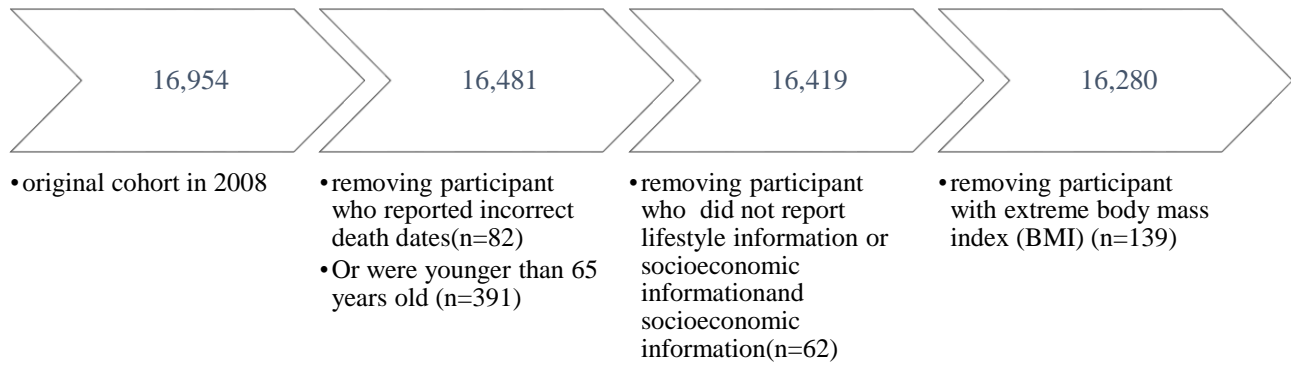

Supplementary Figure 1. Study sampling flowchart.
