# Supplementary material for: Association between 4-dimension lifestyle pattern and 10-year mortality risk in Chinese individuals older than 65: a population-based cohort study
Source: publisher site journal article supplement (doi:10.18632/aging.202695), 2021-03-19
Supplement: Supplementary file [file aging-v13i6-202695-supplementary-material-SD2.pdf]

## SUPPLEMENTARY TABLES

**Supplementary Table 1. Multivariable-adjusted HRs (95% CIs) for disease-accompanied mortality by 4DL score among Chinese older people.**

| 4DL score                                              | Participants | Death | Adjusted HR<br>(95% CI) | P value |
|--------------------------------------------------------|--------------|-------|-------------------------|---------|
| <b>Diabetes-accompanied mortality</b>                  |              |       |                         |         |
| 0                                                      | 1,714        | 23    | 1.00 (reference)        |         |
| 1                                                      | 7,142        | 125   | 1.34 (0.85-2.12)        | 0.20    |
| 2                                                      | 5,395        | 89    | 1.07 (0.67-1.71)        | 0.78    |
| 3-4                                                    | 1,635        | 25    | 0.84 (0.47-1.50)        | 0.56    |
| <b>Cancer-accompanied mortality</b>                    |              |       |                         |         |
| 0                                                      | 1,744        | 61    | 1.00 (reference)        |         |
| 1                                                      | 7,257        | 171   | 0.86 (0.64-1.16)        | 0.32    |
| 2                                                      | 5,515        | 177   | 1.06 (0.78-1.43)        | 0.72    |
| 3-4                                                    | 1,691        | 59    | 1.04 (0.72-1.51)        | 0.83    |
| <b>Gastric or duodenal ulcer-accompanied mortality</b> |              |       |                         |         |
| 0                                                      | 1,669        | 30    |                         |         |
| 1                                                      | 6,985        | 101   | 0.73 (0.48-1.11)        | 0.14    |
| 2                                                      | 5,296        | 88    | 0.88 (0.58-1.35)        | 0.57    |
| 3-4                                                    | 1,623        | 21    | 0.79 (0.45-1.40)        | 0.43    |
| <b>Parkinson's disease-accompanied mortality</b>       |              |       |                         |         |
| 0                                                      | 1,746        | 10    |                         |         |
| 1                                                      | 7,251        | 38    | 1.01 (0.49-2.06)        | 0.98    |
| 2                                                      | 5,523        | 23    | 0.79 (0.37-1.69)        | 0.55    |
| 3-4                                                    | 1,697        | 10    | 1.20 (0.49-2.95)        | 0.69    |

\*Cox model 2 were applied, with adjustment for sex, age (as a linear term), marital status, educational background (as a linear term), residence, economic income and BMI. \*When examining the association between 4DL and mortality accompanied by diabetes, we excluded participants with physician-diagnosed diabetes at baseline to reduce the possibility of reverse causality. We adopted the same measure when examining other disease-accompanied mortality.

**Supplementary Table 2. Sensitivity analysis between the association of 4DL and all-cause mortality.**

| <b>4DL score</b> | <b>Participants</b> | <b>Death</b> | <b>Adjusted HR (95% CI)</b> | <b>P value</b> |
|------------------|---------------------|--------------|-----------------------------|----------------|
| <b>SA1</b>       |                     |              |                             |                |
| 0                | 1,714               | 23           | 1.00 (reference)            |                |
| 1                | 7,142               | 125          | 1.34 (0.85-2.12)            | 0.20           |
| 2                | 5,395               | 89           | 1.07 (0.67-1.71)            | 0.78           |
| 3-4              | 1,635               | 25           | 0.84 (0.47-1.50)            | 0.56           |
| <b>SA2</b>       |                     |              |                             |                |
| 0                | 1,744               | 61           | 1.00 (reference)            |                |
| 1                | 7,257               | 171          | 0.86 (0.64-1.16)            | 0.32           |
| 2                | 5,515               | 177          | 1.06 (0.78-1.43)            | 0.72           |
| 3-4              | 1,691               | 59           | 1.04 (0.72-1.51)            | 0.83           |

\*SA1 was further excluded participants whose survival outcomes occurred in the first 3 years of follow-up; SA2 was further excluded participants with physician-diagnosed disease, including cancer, heart disease, cerebrovascular disease, dementia or Parkinson's disease at baseline.

**Supplementary Table 3. The recommended range of the modified mediterranean diet.**

| <b>Components</b>                              | <b>Recommended range<br/>(Dichotomous value=1)</b> |
|------------------------------------------------|----------------------------------------------------|
| Fresh fruits and nuts                          | Almost everyday                                    |
| Fresh vegetables                               | Almost everyday                                    |
| High ratio of monounsaturated to saturated fat | Preference to vegetable grease                     |
| Legumes                                        | Not every day, but at least once per week          |
| Fish                                           | Not every day, but at least once per week          |
| Dairy products and eggs                        | Not every day, but at least once per week          |
| Meat and meat products                         | Once per week or less                              |
